# Supplementary material for: Intramyocardial Transplantation of Umbilical Cord Mesenchymal Stromal Cells in Chronic Ischemic Cardiomyopathy: A Controlled, Randomized Clinical Trial (HUC-HEART Trial)
Source: PubMed Central journal article supplement — Int J Stem Cells. 2020 Aug 31;13(3):364–76. doi: 10.15283/ijsc20075 (PMC7691850; doi:10.15283/ijsc20075), 2020-08-31
Supplement: IJSC-13-364_Supple.pdf [file IJSC-13-364_Supple.pdf]

**Table S1.** The primary patient inclusion and exclusion criteria for the HUC-HEART Trial (ClinicalTrials.gov Identifier: NCT02323477)

| Inclusion criteria                                                                                                          | Exclusion criteria                                                   |
|-----------------------------------------------------------------------------------------------------------------------------|----------------------------------------------------------------------|
| 30- to 80-year-old male patients with ischemic heart disease who agreed to participate in the study and undergo CABG        | Acute cardiac decompensation                                         |
| 25% < LVEF < 45% (measured via cardiac MRI and echocardiography)                                                            | Acute myocardial infarction                                          |
| NYHA class II-IV patients                                                                                                   | Congenital heart disease                                             |
| Hemodynamic stability (patients not requiring pre-operative intra-aortic balloon pump or inotropic/blood pressure support). | Additional surgical heart disease other than coronary artery disease |
|                                                                                                                             | Malignant arrhythmia                                                 |
|                                                                                                                             | All malignancies                                                     |
|                                                                                                                             | HbA1c level >10% (86 mmol/mol), type II diabetes mellitus            |
|                                                                                                                             | Severe liver dysfunction                                             |
|                                                                                                                             | Severe chronic obstructive pulmonary disease                         |
|                                                                                                                             | Coagulopathy                                                         |
|                                                                                                                             | Immunosuppressive treatment                                          |
|                                                                                                                             | Acute hepatitis,                                                     |
|                                                                                                                             | Hepatitis B, C or HIV infection                                      |
|                                                                                                                             | Chronic liver or renal failure                                       |
|                                                                                                                             | Connective tissue disease                                            |
|                                                                                                                             | Stroke                                                               |
|                                                                                                                             | Active tuberculosis                                                  |
|                                                                                                                             | Chronic hematological diseases                                       |
|                                                                                                                             | Social and mental disabilities                                       |
|                                                                                                                             | Acute cardiac decompensation                                         |

**Table S2.** Postproduction quality control and fractional analysis of cell harvests to be transplanted

| Measured variable                | BM-MNCs             | HUC-MSCs                 |
|----------------------------------|---------------------|--------------------------|
| Cell number, mean (min-max)      | $70 \times 10^7$    | $21 \sim 26 \times 10^6$ |
| Viability rate, mean % (min-max) | ND                  | 93.4 (91.9~94.9)         |
| CD34, mean % (min-max)           | 0.052 (0.043~0.065) | <0.01                    |
| CD45, mean % (min-max)           | 71.8 (60.3~83.1)    | <0.01                    |
| CD73, mean % (min-max)           | ND                  | 99.9 (99.8~100.0)        |
| CD90, mean % (min-max)           | ND                  | 99.8 (99.6~100.0)        |
| CD105, mean % (min-max)          | ND                  | 97.7 (97.3~98.1)         |
| Proliferation rate <sup>a</sup>  | ND                  | 3.1 (2.7~3.5)            |
| Karyotype stability              | ND                  | ++++                     |

ND: not determined.

<sup>a</sup>Fold increase [mean, (min-max)] in the number of cultured cells for 6 days.

**Table S3.** Statistical tests used in the HUC-HEART trial

| Parameters                                                            | Statistical tests used                                                                                          |
|-----------------------------------------------------------------------|-----------------------------------------------------------------------------------------------------------------|
| Age (Table 2)                                                         | Kruskal-Wallis                                                                                                  |
| Smoking (Table 2)                                                     | Chi-Square                                                                                                      |
| Alcohol consumption (Table 2)                                         | Chi-Square                                                                                                      |
| Type 2 DM (Table 2)                                                   | Chi-Square                                                                                                      |
| Hypertension (Table 2)                                                | Chi-Square                                                                                                      |
| TIA (Table 2)                                                         | Chi-Square                                                                                                      |
| Hypercholesterolemia (Table 2)                                        | Chi-Square                                                                                                      |
| Stroke (Table 2)                                                      | Chi-Square                                                                                                      |
| No of Bypass Graft (Table 2)                                          | Kruskal-Wallis                                                                                                  |
| Common laboratory findings<br>(Supplementary Table S2)                | Kruskal-Wallis or One-way ANOVA, where appropriate                                                              |
| Left ventricle volume measurements by MRI<br>(Supplementary Table S3) | One-way ANOVA                                                                                                   |
| NYHA (Table 4)                                                        | One-way ANOVA                                                                                                   |
| NT-proBNP (Fig. 3)                                                    | Kruskal-Wallis (for group comparison), Friedman (time follow-up, post-hoc Wilcoxon with Bonferroni corrections) |
| LVEF change (%) by MRI (Fig. 4A)                                      | Kruskal-Wallis (group comparison), Wilcoxon (baseline -12-month follow-up)                                      |
| LVEF change (%) by SPECT (Fig. 4B)                                    | Kruskal-Wallis (group comparison), Wilcoxon (baseline -12-month follow-up)                                      |
| LVEF change (%) by Echo (Fig. 4C)                                     | Friedman test (time follow-up, post-hoc Wilcoxon with Bonferroni corrections)                                   |
| LVEF change ratio by MRI, SPECT and Echo<br>(Fig. 4D)                 | Kruskal-Wallis                                                                                                  |
| Wall motion change by segments (Fig. 6A)                              | Descriptive                                                                                                     |
| Scar score by segments (Fig. 6B)                                      | Descriptive                                                                                                     |
| Wall thickness change (Fig. 6C)                                       | Kruskal-Wallis (group comparison), Wilcoxon (baseline -12-month follow-up)                                      |
| Myocardial mass change (Fig. 6D)                                      | Kruskal-Wallis (group comparison), Paired sample t test (baseline -12-month follow-up)                          |
| Hibernating and necrotic area changes by PET<br>(Fig. 7A and B)       | Kruskal-Wallis (group comparison), Wilcoxon (baseline -12-month follow-up)                                      |
| Holter rhythm monitoring (Table 3)                                    | Wilcoxon (baseline-12 months)                                                                                   |
| 6-min walking test (Fig. 8)                                           | Paired sample t test (baseline -12-month follow-up), Repeated measures ANOVA (group comparison)                 |

**Table S4.** Common laboratory findings at baseline and after transplantation (1, 3, 6 and 12 months)

|                                  | Months   | Control          | BM-MNC           | HUC-MSC          | Significance*                                  |
|----------------------------------|----------|------------------|------------------|------------------|------------------------------------------------|
| CK-MB                            | Baseline | 2.6 (11.4)       | 14.0 (34.7)      | 2.7 (14.6)       | $\chi^2=6.283$ ; $p=0.043$ (I-II) <sup>a</sup> |
| Median (IQR)                     | 1        | 1.7 (10.5)       | 10.0 (11.5)      | 3.1 (12.2)       | $\chi^2=2.382$ ; $p=0.304$                     |
| $\mu\text{g/dl}$                 | 3        | 12.0 (13.1)      | 5.0 (8.4)        | 6.2 (13.7)       | $\chi^2=0.187$ ; $p=0.911$                     |
|                                  | 6        | 13.0 (17.8)      | 11.0 (20.8)      | 4.1 (13.6)       | $\chi^2=0.589$ ; $p=0.752$                     |
|                                  | 12       | 2.0 (11.5)       | 2.1 (9.3)        | 4.0 (14.3)       | $\chi^2=0.990$ ; $p=0.610$                     |
| Troponin-I                       | Baseline | 0.017 (0.785)    | 0.060 (0.27)     | 0.060 (0.382)    | $\chi^2=1.587$ ; $p=0.452$                     |
| Median (IQR)                     | 1        | 0.022 (0.048)    | 0.030 (0.027)    | 0.029 (0.041)    | $\chi^2=0.359$ ; $p=0.836$                     |
| ng/ml                            | 3        | 0.01 (0.014)     | 0.014 (0.070)    | 0.020 (0.022)    | $\chi^2=3.910$ ; $p=0.142$                     |
|                                  | 6        | 0.018 (0.073)    | 0.020 (0.011)    | 0.012 (0.032)    | $\chi^2=0.403$ ; $p=0.818$                     |
|                                  | 12       | 0.011 (0.023)    | 0.025 (0.053)    | 0.014 (0.051)    | $\chi^2=1.698$ ; $p=0.428$                     |
| HGB                              | Baseline | 14.5 $\pm$ 0.4   | 13.4 $\pm$ 0.4   | 13.8 $\pm$ 0.4   | F=1.503; $p=0.232$                             |
| Mean $\pm$ SE g/dl               | 1        | 13.3 $\pm$ 0.3   | 12.5 $\pm$ 0.5   | 12.7 $\pm$ 0.4   | F=1.253; $p=0.295$                             |
|                                  | 3        | 14.2 $\pm$ 0.4   | 13.4 $\pm$ 0.5   | 13.7 $\pm$ 0.4   | F=0.673; $p=0.515$                             |
|                                  | 6        | 13.9 $\pm$ 0.4   | 14.3 $\pm$ 0.4   | 14.1 $\pm$ 0.5   | F=0.095; $p=0.910$                             |
|                                  | 12       | 14.0 $\pm$ 0.5   | 14.1 $\pm$ 0.4   | 14.5 $\pm$ 0.4   | F=0.318; $p=0.729$                             |
| Platelet                         | Baseline | 229.3 $\pm$ 18.3 | 240.3 $\pm$ 18.3 | 244.1 $\pm$ 17.1 | F=0.191; $p=0.827$                             |
| Mean $\pm$ SE 10 <sup>9</sup> /L | 1        | 253.4 $\pm$ 20.1 | 294.1 $\pm$ 22.7 | 294.2 $\pm$ 20.4 | F=1.259; $p=0.294$                             |
|                                  | 3        | 228.5 $\pm$ 16.9 | 274.0 $\pm$ 20.6 | 237.3 $\pm$ 13.8 | F=1.780; $p=0.161$                             |
|                                  | 6        | 208.4 $\pm$ 11.4 | 253.6 $\pm$ 20.0 | 226.9 $\pm$ 15.1 | F=1.606; $p=0.213$                             |
|                                  | 12       | 225.3 $\pm$ 17.5 | 237.1 $\pm$ 22.2 | 220.3 $\pm$ 10.2 | F=0.243; $p=0.786$                             |
| WBC                              | Baseline | 8.9 (2.8)        | 8.5 (2.8)        | 8.5 (3.7)        | $\chi^2=0.551$ ; $p=0.759$                     |
| Median (IQR)                     | 1        | 8.4 (3.1)        | 8.3 (1.0)        | 8.6 (3.1)        | $\chi^2=0.164$ ; $p=0.921$                     |
| 10 <sup>9</sup> /L               | 3        | 7.7 (3.6)        | 8.1 (1.5)        | 7.3 (2.5)        | $\chi^2=0.572$ ; $p=0.751$                     |
|                                  | 6        | 7.5 (1.5)        | 9.1 (4.1)        | 7.5 (2.4)        | $\chi^2=4.501$ ; $p=0.105$                     |
|                                  | 12       | 7.8 (1.7)        | 8.4 (1.2)        | 8.5 (2.8)        | $\chi^2=1,394$ ; $p=0.498$                     |
| Glycose                          | Baseline | 122.5 (67.8)     | 122.5 (163.5)    | 144.0 (138.8)    | $\chi^2=1.416$ ; $p=0.493$                     |
| Median (IQR)                     | 1        | 115.0 (58.5)     | 109.0 (61.0)     | 135.0 (95.3)     | $\chi^2=1.355$ ; $p=0.508$                     |
| mg/dl                            | 3        | 109.5 (79.5)     | 105.0 (147.0)    | 157.5 (126.8)    | $\chi^2=1.781$ ; $p=0.410$                     |
|                                  | 6        | 105.0 (56.0)     | 134.0 (142.0)    | 135.5 (138.3)    | $\chi^2=1.212$ ; $p=0.545$                     |
|                                  | 12       | 113.0 (75.3)     | 112.5 (27.3)     | 151.5 (83.0)     | $\chi^2=3.938$ ; $p=0.140$                     |
| Urea                             | Baseline | 34.0 (18.3)      | 37.5 (20.5)      | 42.0 (15.5)      | $\chi^2=0.343$ ; $p=0.843$                     |
| Median (IQR)                     | 1        | 38.0 (11.0)      | 32.5 (24.0)      | 39.0 (20.3)      | $\chi^2=1.525$ ; $p=0.467$                     |
| mg/dl                            | 3        | 36.5 (10.9)      | 32.0 (27.0)      | 37.0 (24.0)      | $\chi^2=0.953$ ; $p=0.621$                     |
|                                  | 6        | 32.0 (11.3)      | 33.0 (18.8)      | 35.5 (10.5)      | $\chi^2=1.440$ ; $p=0.487$                     |
|                                  | 12       | 44.5 (18.3)      | 34.5 (10.3)      | 33.5 (14.8)      | $\chi^2=3.766$ ; $p=0.152$                     |
| Creatinine                       | Baseline | 1.0 (0.4)        | 1.0 (0.2)        | 1.0 (0.5)        | $\chi^2=0.014$ ; $p=0.993$                     |
| Median (IQR)                     | 1        | 1.0 (0.3)        | 1.0 (0.4)        | 1.0 (0.3)        | $\chi^2=0.301$ ; $p=0.860$                     |
| mg/dl                            | 3        | 1.0 (0.3)        | 1.0 (0.4)        | 1.0 (0.3)        | $\chi^2=0.044$ ; $p=0.978$                     |
|                                  | 6        | 1.0 (0.2)        | 1.0 (0.3)        | 1.0 (0.3)        | $\chi^2=0.344$ ; $p=0.842$                     |
|                                  | 12       | 1.1 (0.3)        | 1.0 (0.4)        | 1.0 (0.4)        | $\chi^2=0.464$ ; $p=0.793$                     |

Table S4. Continued

|                 | Months   | Control       | BM-MNC        | HUC-MSC      | Significance*            |
|-----------------|----------|---------------|---------------|--------------|--------------------------|
| AST             | Baseline | 20.0 (12.8)   | 18.5 (11.5)   | 16.0 (7.0)   | $\chi^2=2.854$ ; p=0.240 |
| Median (IQR)    | 1        | 17.0 (7.3)    | 15.5 (9.5)    | 16.5 (7.0)   | $\chi^2=0.197$ ; p=0.906 |
| U/L             | 3        | 18.0 (5.0)    | 19.0 (5.0)    | 15.0 (4.5)   | $\chi^2=4.787$ ; p=0.091 |
|                 | 6        | 17.3 (7.5)    | 17.5 (6.0)    | 18.5 (5.0)   | $\chi^2=0.814$ ; p=0.666 |
|                 | 12       | 16.0 (4.3)    | 16.5 (7.8)    | 16.0 (5.8)   | $\chi^2=0.179$ ; p=0.915 |
| ALT             | Baseline | 24.0 (25.0)   | 21.5 (9.0)    | 19.0 (9.5)   | $\chi^2=3.912$ ; p=0.141 |
| Median (IQR)    | 1        | 16.5 (8.8)    | 17.5 (17.5)   | 14.0 (5.5)   | $\chi^2=2.328$ ; p=0.312 |
| U/L             | 3        | 18.0 (7.7)    | 19.0 (8.0)    | 16.0 (10.0)  | $\chi^2=1.785$ ; p=0.410 |
|                 | 6        | 16.0 (5.5)    | 21.0 (9.5)    | 16.0 (9.0)   | $\chi^2=1.066$ ; p=0.587 |
|                 | 12       | 16.5 (13.5)   | 17.0 (6.0)    | 16.0 (8.8)   | $\chi^2=0.538$ ; p=0.764 |
| LDH             | Baseline | 222.0 (147.0) | 191.0 (209.0) | 204.0 (81.0) | $\chi^2=0.014$ ; p=0.993 |
| Median (IQR)    | 1        | 186.0 (73.8)  | 176.0 (75.8)  | 207.0 (95.5) | $\chi^2=1.504$ ; p=0.471 |
| U/L             | 3        | 183.0 (38.0)  | 186.5 (88.8)  | 195.5 (52.5) | $\chi^2=0.240$ ; p=0.887 |
|                 | 6        | 188.0 (53.0)  | 179.0 (72.3)  | 190.5 (50.5) | $\chi^2=0.595$ ; p=0.743 |
|                 | 12       | 195.0 (62.0)  | 187.0 (43.0)  | 195.0 (50.5) | $\chi^2=1.080$ ; p=0.583 |
| Amylase         | Baseline | 69.0 (44.3)   | 45.0 (45.5)   | 64.0 (21.0)  | $\chi^2=3.444$ ; p=0.179 |
| Median (IQR)    | 1        | 70.0 (35.0)   | 62.5 (37.0)   | 72.0 (49.0)  | $\chi^2=1.054$ ; p=0.590 |
| U/L             | 3        | 71.0 (48.5)   | 61.5 (33.5)   | 81.0 (53.5)  | $\chi^2=1.673$ ; p=0.433 |
|                 | 6        | 73.0 (42.1)   | 57.0 (52.3)   | 75.5 (43.3)  | $\chi^2=0.880$ ; p=0.644 |
|                 | 12       | 80.0 (42.0)   | 66.0 (39.0)   | 77.0 (42.5)  | $\chi^2=0.628$ ; p=0.731 |
| Lipase          | Baseline | 28.0 (26.0)   | 18.0 (14.8)   | 28.0 (13.0)  | $\chi^2=5.364$ ; p=0.068 |
| Median (IQR)    | 1        | 27.0 (27.0)   | 23.0 (21.5)   | 34.0 (30.5)  | $\chi^2=4.376$ ; p=0.112 |
| U/L             | 3        | 24.5 (13.5)   | 23.0 (23.5)   | 37.0 (30.5)  | $\chi^2=4.857$ ; p=0.088 |
|                 | 6        | 28.0 (27.5)   | 28.0 (32.5)   | 37.0 (17.0)  | $\chi^2=1.943$ ; p=0.379 |
|                 | 12       | 28.0 (20.8)   | 30.0 (14.0)   | 39.0 (35.8)  | $\chi^2=2.979$ ; p=0.226 |
| Total Protein   | Baseline | 6.9±0.2       | 6.8±0.2       | 6.9±0.1      | F=0.125; p=0.883         |
| Mean±SE         | 1        | 7.2±0.1       | 7.3±0.2       | 7.3±0.1      | F=0.156; p=0.856         |
| g/dl            | 3        | 7.3±0.1       | 7.2±0.1       | 7.3±0.2      | F=0.317; p=0.730         |
|                 | 6        | 7.4±0.1       | 7.5±0.1       | 7.4±0.1      | F=0.407; p=0.669         |
|                 | 12       | 7.0±0.1       | 7.2±0.1       | 7.1±0.1      | F=0.388; p=0.681         |
| Albumin         | Baseline | 4.1 (0.8)     | 4 (0.8)       | 4.2 (0.4)    | $\chi^2=0.991$ ; p=0.609 |
| Median (IQR)    | 1        | 4.1 (0.7)     | 4.2 (0.9)     | 3.9 (0.7)    | $\chi^2=0.993$ ; p=0.609 |
| g/dl            | 3        | 4.3 (0.4)     | 4.2 (0.8)     | 4.4 (0.5)    | $\chi^2=2.087$ ; p=0.352 |
|                 | 6        | 4.4 (0.4)     | 4.4 (0.8)     | 4.4 (0.3)    | $\chi^2=1.133$ ; p=0.567 |
|                 | 12       | 4.4 (0.3)     | 4.3 (0.6)     | 4.4 (0.4)    | $\chi^2=0.032$ ; p=0.984 |
| Total Bilirubin | Baseline | 0.6 (0.4)     | 0.6 (0.9)     | 0.6 (0.5)    | $\chi^2=0.434$ ; p=0.805 |
| Median (IQR)    | 1        | 0.6 (0.3)     | 0.5 (0.3)     | 0.4 (0.2)    | $\chi^2=3.384$ ; p=0.184 |
| mg/dl           | 3        | 0.5 (0.3)     | 0.5 (0.3)     | 0.5 (0.3)    | $\chi^2=0.620$ ; p=0.733 |
|                 | 6        | 0.9 (0.6)     | 0.7 (0.5)     | 0.7 (0.3)    | $\chi^2=1.410$ ; p=0.494 |
|                 | 12       | 0.6 (0.4)     | 0.6 (0.6)     | 0.6 (0.6)    | $\chi^2=0.305$ ; p=0.858 |

Table S4. Continued

|                  | Months   | Control          | BM-MNC           | HUC-MSC         | Significance*              |
|------------------|----------|------------------|------------------|-----------------|----------------------------|
| Direct Bilirubin | Baseline | 0.2 (0.1)        | 0.2 (0.1)        | 0.2 (0.1)       | $\chi^2=1.287$ ; $p=0.525$ |
| Median (IQR)     | 1        | 0.2 (0.1)        | 0.1 (0.1)        | 0.1 (0.1)       | $\chi^2=3.436$ ; $p=0.179$ |
| mg/dl            | 3        | 0.1 (0.1)        | 0.1 (0.1)        | 0.1 (0.1)       | $\chi^2=0.097$ ; $p=0.953$ |
|                  | 6        | 0.2 (0.2)        | 0.2 (0.1)        | 0.2 (0.1)       | $\chi^2=0.183$ ; $p=0.912$ |
|                  | 12       | 0.2 (0.1)        | 0.2 (0.1)        | 0.2 (0.2)       | $\chi^2=0.138$ ; $p=0.934$ |
| Cholesterol      | Baseline | 173.5 (43.0)     | 150.5 (67.5)     | 172.0 (80.0)    | $\chi^2=0.705$ ; $p=0.703$ |
| Median (IQR)     | 1        | 147.0 (47.0)     | 158.0 (76.0)     | 138.0 (55.5)    | $\chi^2=1.521$ ; $p=0.467$ |
| mg/dl            | 3        | 186.5 (95.4)     | 144.0 (112.0)    | 167.0 (73.5)    | $\chi^2=0.944$ ; $p=0.624$ |
|                  | 6        | 212.0 (87.3)     | 146.0 (54.5)     | 164.0 (52.5)    | $\chi^2=3.383$ ; $p=0.184$ |
|                  | 12       | 208.5 (109.3)    | 156.5 (63.0)     | 173.0 (62.0)    | $\chi^2=1.062$ ; $p=0.588$ |
| HDL              | Baseline | 43.1 $\pm$ 2.8   | 37.5 $\pm$ 3.0   | 36.7 $\pm$ 2.2  | F=1.846; $p=0.169$         |
| Mean $\pm$ SE    | 1        | 41.9 $\pm$ 2.4   | 40.2 $\pm$ 3.1   | 36.9 $\pm$ 1.8  | F=1.428; $p=0.250$         |
| mg/dl            | 3        | 42.1 $\pm$ 3.0   | 38.0 $\pm$ 2.2   | 39.4 $\pm$ 2.0  | F=0.618; $p=0.544$         |
|                  | 6        | 41.6 $\pm$ 3.0   | 43.6 $\pm$ 2.8   | 38.9 $\pm$ 1.6  | F=1.004; $p=0.376$         |
|                  | 12       | 43.8 $\pm$ 2.8   | 35.7 $\pm$ 2.2   | 39.3 $\pm$ 2.6  | F=1.550; $p=0.225$         |
| LDL              | Baseline | 93.9 $\pm$ 7.5   | 94.6 $\pm$ 11.7  | 94.2 $\pm$ 7.0  | F=0.002; $p=0.998$         |
| Mean $\pm$ SE    | 1        | 76.8 $\pm$ 5.8   | 90.5 $\pm$ 8.7   | 78.6 $\pm$ 6.5  | F=0.900; $p=0.413$         |
| mg/dl            | 3        | 105.4 $\pm$ 11.6 | 96.5 $\pm$ 13.3  | 93.7 $\pm$ 10.0 | F=0.309; $p=0.736$         |
|                  | 6        | 118.1 $\pm$ 13.7 | 105.6 $\pm$ 14.0 | 102.4 $\pm$ 7.8 | F=0.576; $p=0.567$         |
|                  | 12       | 117.7 $\pm$ 15.9 | 97.4 $\pm$ 9.7   | 107.3 $\pm$ 6.9 | F=0.641; $p=0.533$         |
| Triglyceride     | Baseline | 150.0 (78.0)     | 96.0 (91.0)      | 129.0 (112.0)   | $\chi^2=3.023$ ; $p=0.221$ |
| Median (IQR)     | 1        | 140.0 (90.8)     | 125.0 (72.0)     | 116.0 (91.0)    | $\chi^2=1.335$ ; $p=0.513$ |
| mg/dl            | 3        | 180.5 (83.3)     | 134.0 (147.0)    | 170.0 (158.5)   | $\chi^2=1.090$ ; $p=0.580$ |
|                  | 6        | 161.0 (33.3)     | 142.5 (79.8)     | 143.0 (110.5)   | $\chi^2=0.767$ ; $p=0.681$ |
|                  | 12       | 145.0 (114.5)    | 167.5 (81.5)     | 158.0 (146.5)   | $\chi^2=0.069$ ; $p=0.966$ |
| TSH              | Baseline | 2.1 (1.7)        | 1.1 (2.1)        | 1.1 (1.9)       | $\chi^2=1.768$ ; $p=0.409$ |
| Median (IQR)     | 1        | 1.2 (1.2)        | 1.7 (2.8)        | 1.7 (2.0)       | $\chi^2=0.029$ ; $p=0.986$ |
| mU/L             | 3        | 1.2 (1.3)        | 1.5 (2.1)        | 1.3 (2.3)       | $\chi^2=0.313$ ; $p=0.855$ |
|                  | 6        | 1.4 (2.1)        | 0.9 (1.9)        | 1.3 (1.5)       | $\chi^2=0.911$ ; $p=0.634$ |
|                  | 12       | 1.6 (1.3)        | 1.3 (2.0)        | 1.4 (1.1)       | $\chi^2=0.607$ ; $p=0.738$ |
| Fibrinogen       | Baseline | 3.9 (1.3)        | 3.6 (1.1)        | 3.6 (1.1)       | $\chi^2=0.267$ ; $p=0.875$ |
| Median (IQR)     | 1        | 3.7 (1.3)        | 3.8 (1.5)        | 4.1 (1.8)       | $\chi^2=0.679$ ; $p=0.712$ |
| mg/dl            | 3        | 3.5 (1.3)        | 3.9 (0.8)        | 3.2 (1.6)       | $\chi^2=3.034$ ; $p=0.219$ |
|                  | 6        | 3.4 (0.8)        | 3.4 (2.9)        | 3.3 (0.8)       | $\chi^2=0.053$ ; $p=0.974$ |
|                  | 12       | 3.6 (1.1)        | 3.7 (1.4)        | 3.3 (1.4)       | $\chi^2=0.561$ ; $p=0.756$ |

<sup>a</sup>Based on Bonferroni corrected Mann-Whitney test, only baseline CK-MB values between control and BM-MNC groups were found significantly different, albeit in normal range. CK-MB: blood creatine kinase, HGB: hemoglobin, WBC: white blood cell, AST: aspartate aminotransferase, ALT: alanine transaminase, LDH: lactate dehydrogenase, HDL: high-density lipoprotein, LDL: low-density lipoprotein, TSH: thyroid stimulating hormone.

\*  $\chi^2$ : Kruskal-Wallis test results; F: ANOVA test results.

**Table S5.** Left ventricle volume measurements by MRI comparing baseline with the end of 12-month follow-up

|          | Control      |              |                        | BM-MNC       |              |                        | HUC-MSC      |              |                                     |
|----------|--------------|--------------|------------------------|--------------|--------------|------------------------|--------------|--------------|-------------------------------------|
|          | Baseline     | Month 12     | Significance*          | Baseline     | Month 12     | Significance*          | Baseline     | Month 12     | Significance*                       |
| EDV (ml) | 154.9 ± 15.4 | 155.9 ± 19.4 | Z = 0.178<br>p = 0.859 | 192.0 ± 25.9 | 205.2 ± 24.5 | Z = 0.405<br>p = 0.686 | 186.5 ± 14.1 | 192.8 ± 14.6 | Z = 0.621<br>p = 0.535              |
| ESV (ml) | 100.8 ± 11.6 | 96.3 ± 13.9  | Z = 0.533<br>p = 0.594 | 142.8 ± 24.5 | 147.2 ± 26.5 | Z = 0.405<br>p = 0.686 | 135.8 ± 14.2 | 132.0 ± 14.9 | Z = 0.621<br>p = 0.535              |
| EDVI     | 81.3 ± 6.9   | 80.3 ± 9.1   | Z = 0.415<br>p = 0.678 | 103.0 ± 14.1 | 109.6 ± 14.4 | Z = 0.405<br>p = 0.686 | 97.7 ± 6.2   | 100.5 ± 7.4  | Z = 0.362<br>p = 0.717              |
| ESVI     | 52.8 ± 5.3   | 49.9 ± 7.0   | Z = 0.652<br>p = 0.515 | 76.8 ± 13.6  | 78.9 ± 15.1  | Z = 0.405<br>p = 0.686 | 72.8 ± 7.4   | 68.7 ± 7.7   | Z = 1.030<br>p = 0.301              |
| SV (ml)  | 54.1 ± 5.3   | 59.6 ± 8.2   | Z = 0.356<br>p = 0.722 | 49.3 ± 6.3   | 58.0 ± 4.6   | Z = 1.753<br>p = 0.080 | 50.8 ± 3.3   | 60.8 ± 2.6   | Z = 2.637<br>p = 0.008 <sup>a</sup> |
| CO (l)   | 3.7 ± 0.4    | 4.1 ± 0.4    | Z = 1.472<br>p = 0.141 | 3.8 ± 0.4    | 4.0 ± 0.2    | Z = 0.677<br>p = 0.498 | 3.9 ± 0.4    | 4.2 ± 0.2    | Z = 0.880<br>p = 0.379              |
| CI       | 1.9 ± 0.2    | 2.1 ± 0.2    | Z = 1.402<br>p = 0.161 | 2.0 ± 0.2    | 2.1 ± 0.1    | Z = 0.674<br>p = 0.500 | 2.1 ± 0.2    | 2.2 ± 0.1    | Z = 0.724<br>p = 0.469              |

<sup>a</sup>In HUC-MSC group only, the SV at month 12 compared to baseline increased significantly (Z = 2.637; p = 0.008).

All values are given as mean ± SE.

EDV: end-diastolic volume, ESV: end-systolic volume, EDVI: end-diastolic volume index, ESVI: end-systolic volume index, SV: stroke volume, CO: cardiac output, CI: cardiac index.  
\*Wilcoxon test results.
